# Supplementary material for: A DNA-Modified Live Vaccine Prime–Boost Strategy Broadens the T-Cell Response and Enhances the Antibody Response against the Porcine Reproductive and Respiratory Syndrome Virus
Source: PubMed Central journal article supplement (PMC6630347; doi:10.3390/v11060551), 2019-06-14
Supplement: viruses-11-00551-s001.pdf [file viruses-11-00551-s001.pdf]

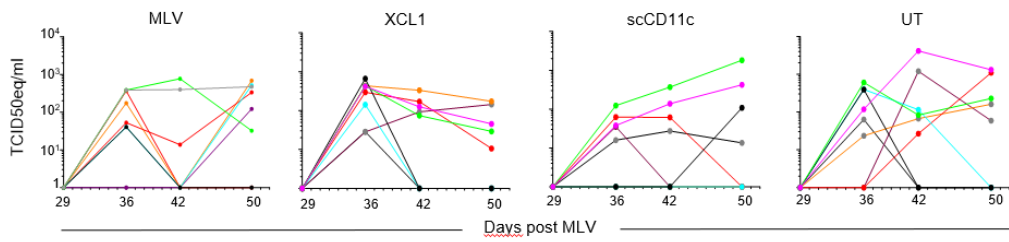

**Supplementary Figure 1. Detection of MLV FL13b RNA in sera.** The sera of the 4 DNA+MLV groups, collected on D29, 36, 42 and 50, were assayed for detection of MLV FL13b RNA using TaqMan qRT-PCR. TCID50eq/ml were calculated. The extrapolated TCID50eq/ml curves are shown for each pig represented by a distinct color.
